# Supplementary material
Source: Springer Nature journal article supplement (https://www.springermedizin.de/resource/supplementary/12911_2011_580_MOESM6_ESM.pdf/9526074)

## Application Store Size

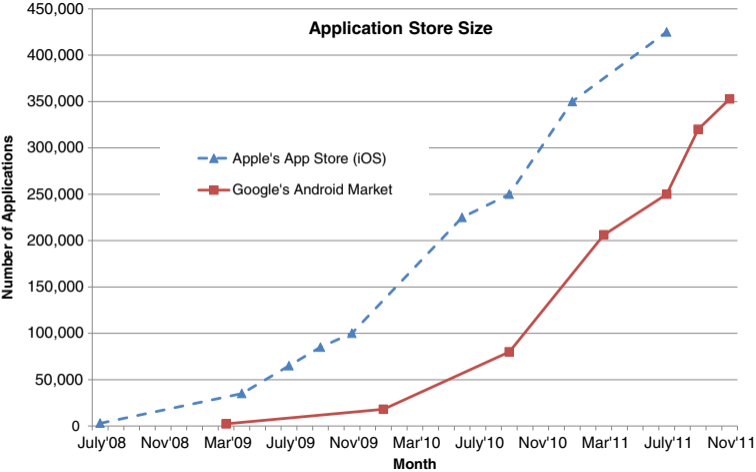

Supplement: MOESM6 [file 9526074]
